# Supplementary material
Source: PubMed Central journal article supplement (PMC6542594)

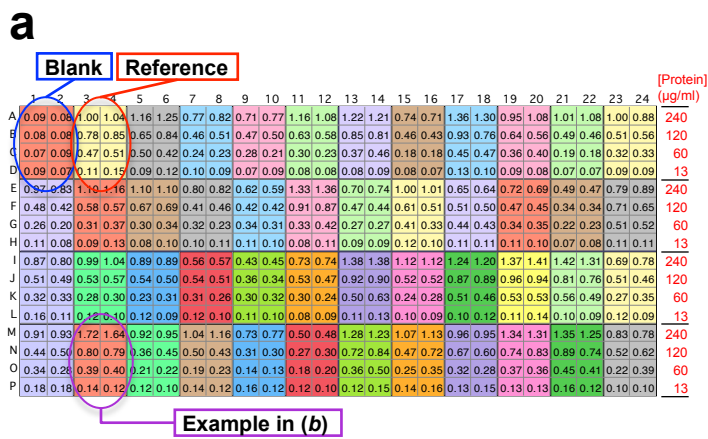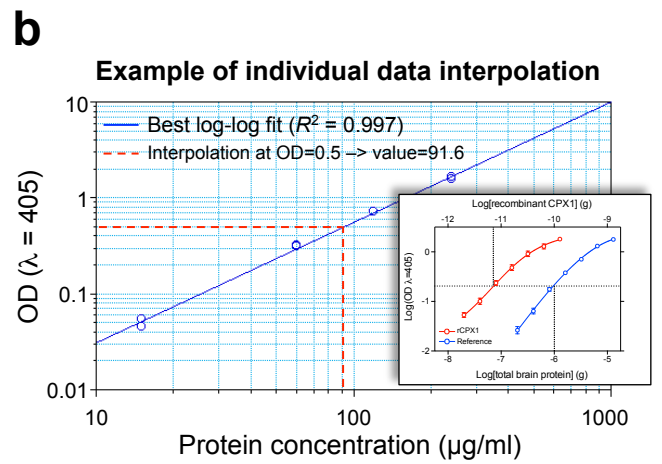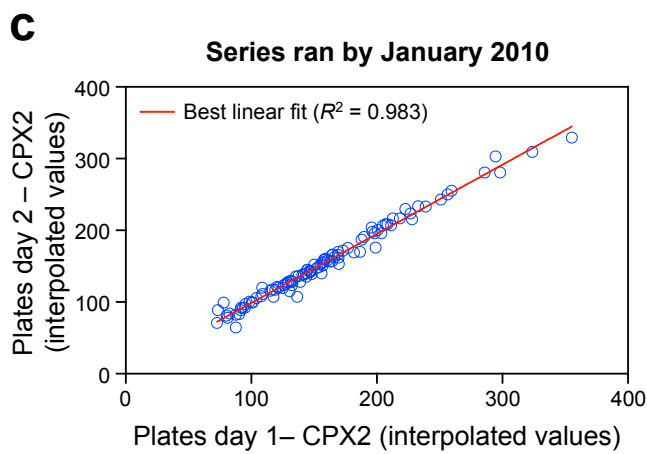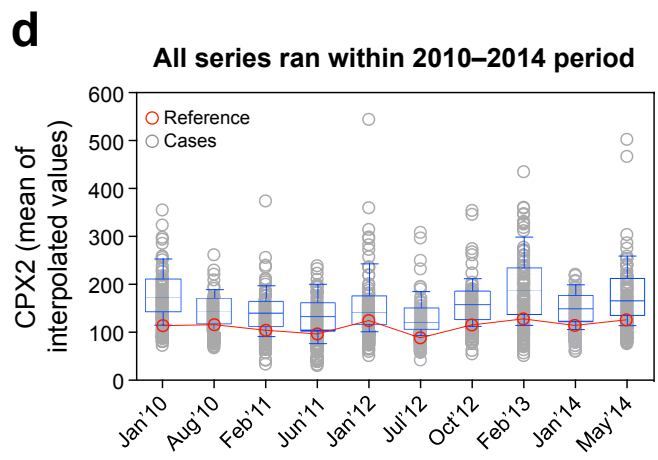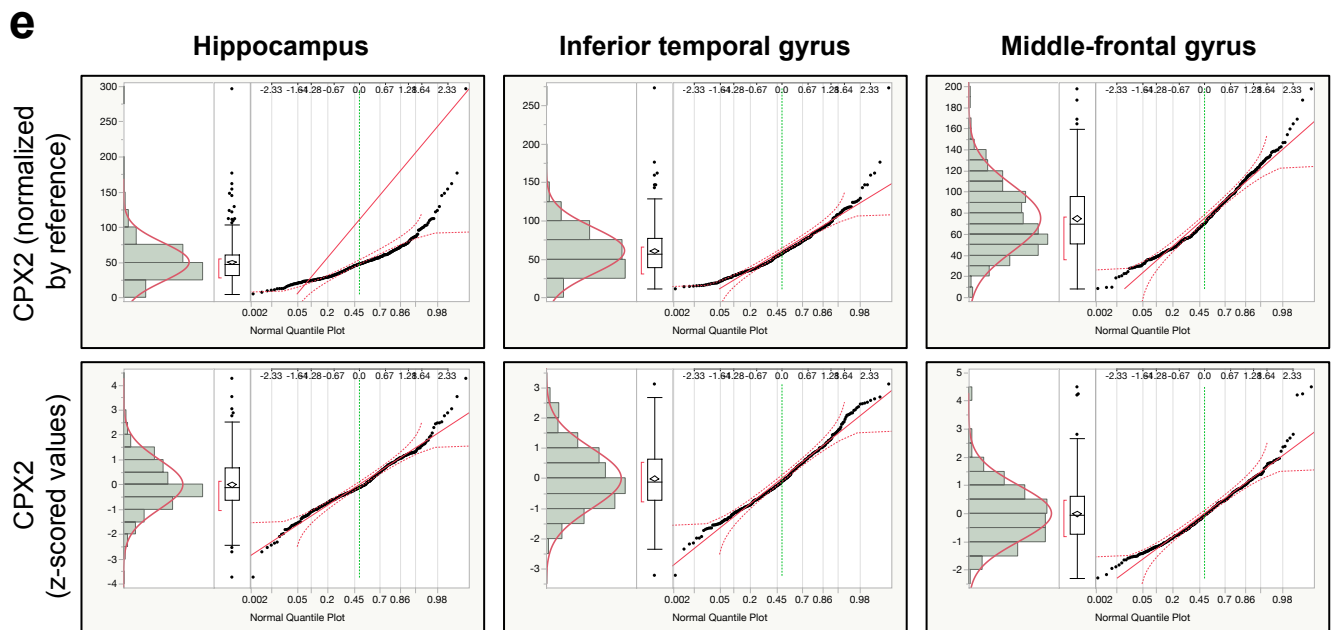

Supplementary Fig. S1 – Ramos-Miguel *et al.*

Supplement: NIHMS917842-supplement-6.pdf [file NIHMS917842-supplement-6.pdf]

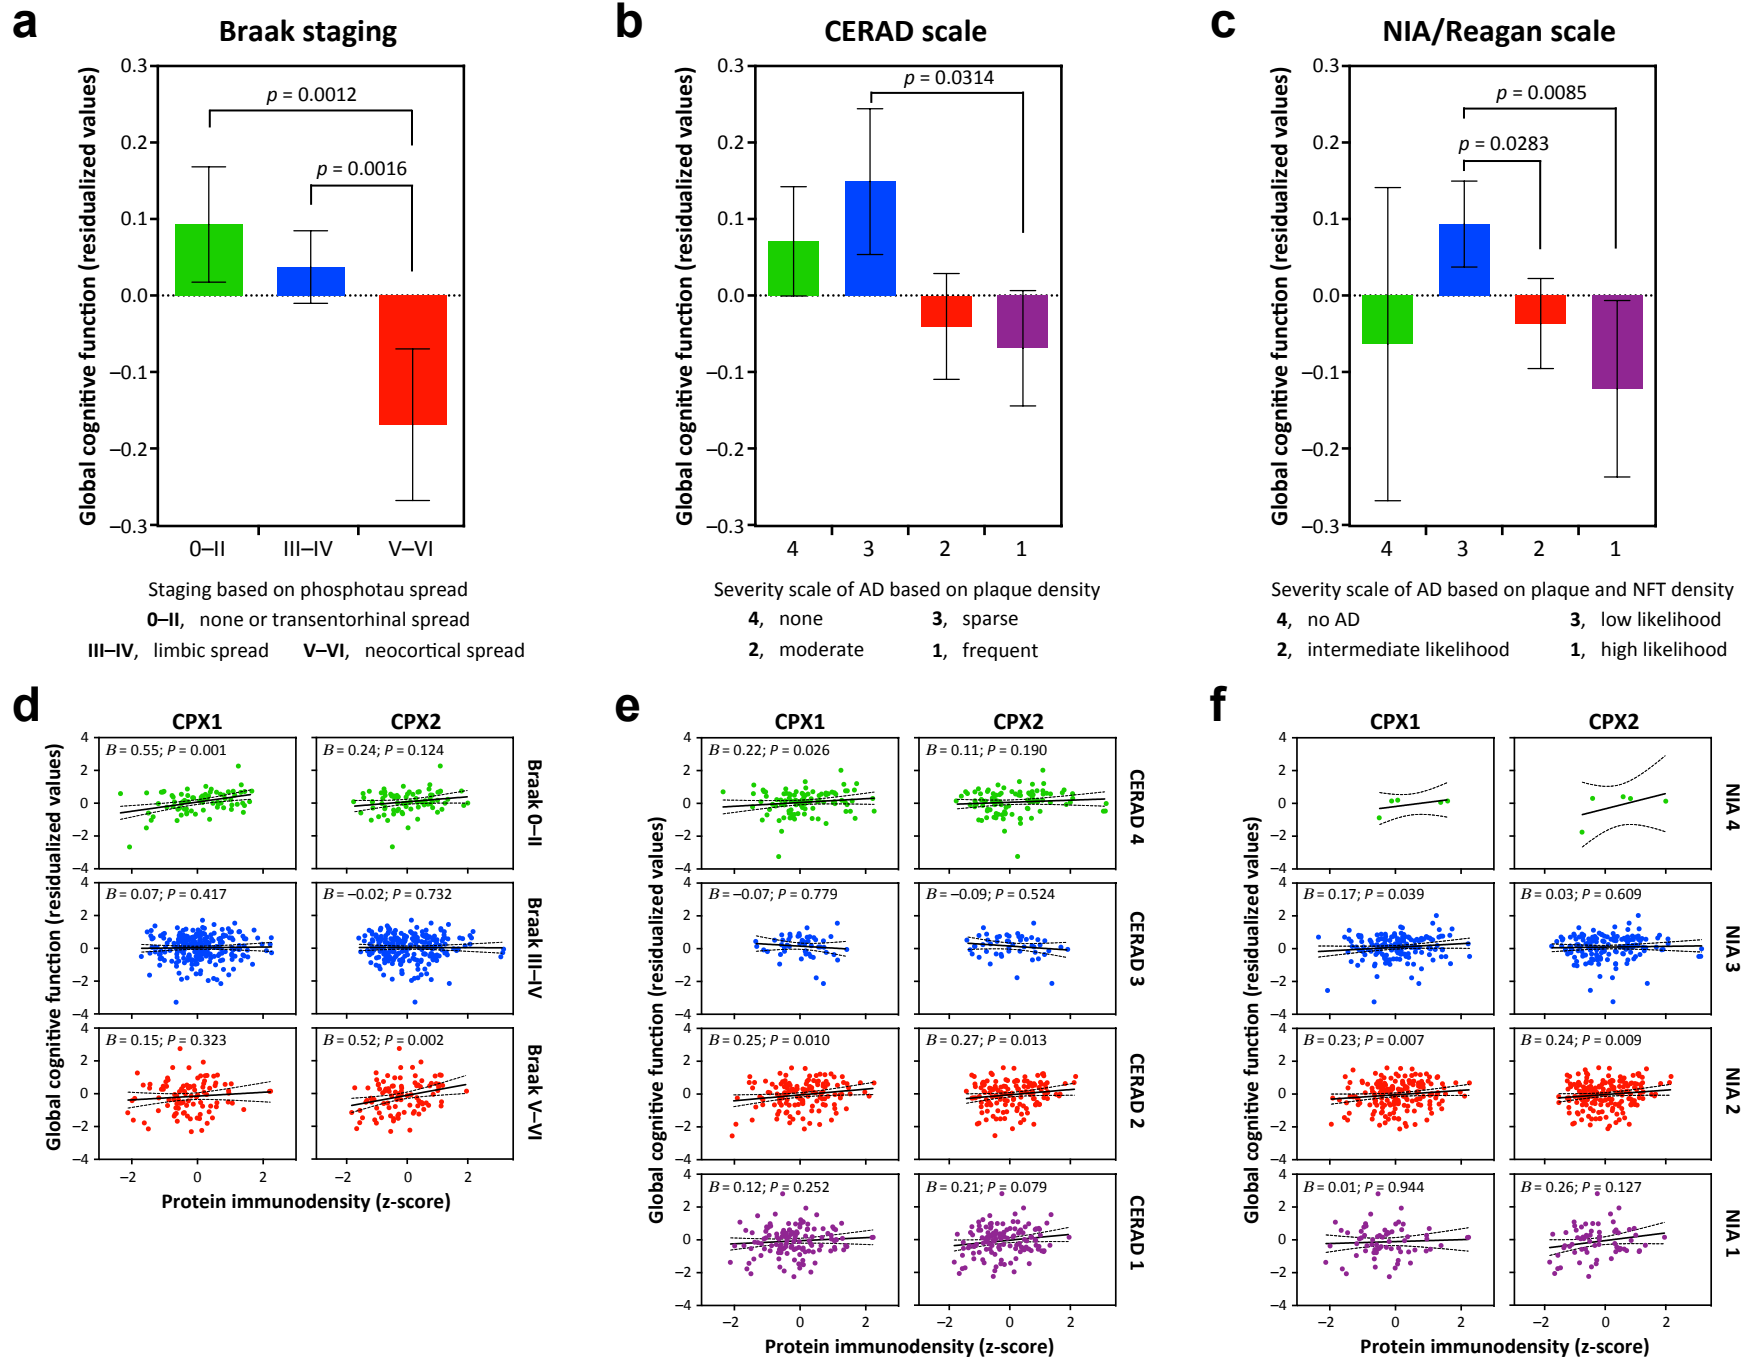

Supplementary Fig. S3 – Ramos-Miguel *et al.*

Supplement: NIHMS917842-supplement-7.pdf [file NIHMS917842-supplement-7.pdf]
